# Supplementary material for: Highly individual patterns of virus-immune IgG effector responses in humans
Source: Springer Nature journal article supplement (doi:10.1007/s00430-016-0457-y), 2016-05-18
Supplement: MOESM3 [file 10158136]

**Table S1: Sex and age distribution of donors**

|                |                 | Sex    |      | Age    |      |
|----------------|-----------------|--------|------|--------|------|
|                |                 | Female | Male | Median | SD   |
| <b>Measles</b> | <b>Total</b>    | 24     | 17   | 27.1   | 16.2 |
|                | <b>Positive</b> | 18     | 11   | 28.9   | 17.0 |
|                | <b>Negative</b> | 6      | 6    | 22.8   | 14.0 |
| <b>HCMV</b>    | <b>Total</b>    | 25     | 16   | 29.1   | 18.8 |
|                | <b>Positive</b> | 16     | 11   | 32.2   | 19.7 |
|                | <b>Negative</b> | 9      | 5    | 23.1   | 15.7 |

Table S1: Female/male distribution of the 41 serum donors. Mean age.
