# Supplementary material for: Highly individual patterns of virus-immune IgG effector responses in humans
Source: Springer Nature journal article supplement (doi:10.1007/s00430-016-0457-y), 2016-05-18
Supplement: MOESM4 [file 10158136]

**Table S2: Raw data for MV immune IgG reaction patterns of individual human sera.**

| Donor no. | Sex    | Age (years) | PRNT (IU/ml) | PRNT (Rank) | ELISA (IU/ml) | FcγRIIIA-ζ activation |             |       | FcγRIIA-ζ activation |             |       | FcγRIIB-ζ activation |             |       | FcγRI-ζ activation |             |       | Assay |
|-----------|--------|-------------|--------------|-------------|---------------|-----------------------|-------------|-------|----------------------|-------------|-------|----------------------|-------------|-------|--------------------|-------------|-------|-------|
|           |        |             |              |             |               | Fold of cutoff        | OD (450 nm) | SD    | Fold of cutoff       | OD (450 nm) | SD    | Fold of cutoff       | OD (450 nm) | SD    | Fold of cutoff     | OD (450 nm) | SD    |       |
| 28        | female | 18          | 80.392       | 1.0         | 13000         | 13.8                  | 1.173       | 0.007 | 8.1                  | 1.051       | 0.035 | 6.0                  | 0.520       | 0.074 | 2.8                | 0.464       | 0.063 | 1     |
| 24        | female | 1.7         | 51.667       | 2.0         | 15000         | 14.1                  | 1.199       | 0.047 | 7.6                  | 0.982       | 0.031 | 6.3                  | 0.552       | 0.027 | 2.7                | 0.455       | 0.075 | 1     |
| 27        | female | 40          | 32.890       | 3.0         | 11000         | 12.1                  | 1.031       | 0.235 | 8.0                  | 1.034       | 0.025 | 6.0                  | 0.514       | 0.016 | 2.9                | 0.485       | 0.071 | 1     |
| 35        | male   | 27          | 11.549       | 4.0         | 9000          | 26.1                  | 2.247       | 0.030 | 13.5                 | 1.420       | 0.184 | 3.8                  | 0.369       | 0.002 | 12.1               | 1.296       | 0.009 | 2     |
| IVIG      |        |             | 11.549       | 5.0         | 9000          | 10.6                  | 0.901       | 0.016 | 6.8                  | 0.875       | 0.129 | 5.1                  | 0.448       | 0.001 | 2.8                | 0.468       | 0.004 | 1     |
| 31        | female | 90          | 10.779       | 6.0         | 13000         | 20.9                  | 1.800       | 0.028 | 12.2                 | 1.283       | 0.097 | 2.5                  | 0.250       | 0.006 | 14.0               | 1.498       | 0.071 | 2     |
| 32        | female | 47          | 3.909        | 7.0         | 7100          | 21.7                  | 1.867       | 0.069 | 12.9                 | 1.356       | 0.008 | 1.6                  | 0.152       | 0.001 | 13.3               | 1.427       | 0.066 | 2     |
| 18        | male   | 63          | 3.596        | 8.0         | 3000          | 10.3                  | 0.876       | 0.133 | 5.8                  | 0.744       | 0.104 | 3.3                  | 0.287       | 0.033 | 2.5                | 0.417       | 0.051 | 1     |
| 39        | female | 43          | 3.179        | 9.0         | 9100          | 17.0                  | 1.552       | 0.074 | 8.2                  | 0.940       | 0.107 | 7.3                  | 0.600       | 0.010 | 4.2                | 0.459       | 0.053 | 3     |
| 11        | male   | 31          | 3.092        | 10.0        | 12000         | 12.3                  | 1.049       | 0.063 | 8.6                  | 1.103       | 0.047 | 6.8                  | 0.589       | 0.047 | 2.6                | 0.429       | 0.034 | 1     |
| 19        | male   | 27          | 2.382        | 11.0        | 3300          | 6.2                   | 0.525       | 0.000 | 5.1                  | 0.655       | 0.020 | 1.4                  | 0.123       | 0.008 | 3.5                | 0.579       | 0.058 | 1     |
| 40        | male   | 20          | 1.691        | 12.0        | 5600          | 11.8                  | 1.077       | 0.076 | 2.3                  | 0.268       | 0.011 | 1.6                  | 0.133       | 0.011 | 1.9                | 0.194       | 0.007 | 3     |
| 41        | female | 29          | 1.691        | 13.0        | 1900          | 2.6                   | 0.238       | 0.018 | 1.5                  | 0.175       | 0.008 | 1.0                  | 0.083       | 0.013 | 1.4                | 0.152       | 0.046 | 3     |
| 38        | female | 24          | 1.376        | 14.0        | 1000          | 13.5                  | 1.232       | 0.022 | 2.2                  | 0.258       | 0.011 | 2.1                  | 0.177       | 0.007 | 2.1                | 0.233       | 0.015 | 3     |
| 1         | female | 28          | 1.090        | 15.0        | 3200          | 3.9                   | 0.335       | 0.018 | 3.0                  | 0.387       | 0.003 | 2.9                  | 0.251       | 0.013 | 1.6                | 0.273       | 0.039 | 1     |
| 36        | male   | 27          | 1.040        | 16.0        | 4800          | 18.9                  | 1.565       | 0.168 | 8.6                  | 0.803       | 0.056 | <b>0.9</b>           | 0.095       | 0.008 | 8.1                | 0.865       | 0.058 | 2     |
| 37        | male   | 17          | 0.728        | 17.0        | 510           | 7.8                   | 0.681       | 0.093 | 1.8                  | 0.213       | 0.023 | 1.7                  | 0.145       | 0.063 | 1.1                | 0.117       | 0.004 | 3     |
| 26        | female | 27          | 0.654        | 18.0        | 1000          | 16.2                  | 1.390       | 0.013 | 5.9                  | 0.620       | 0.084 | 2.0                  | 0.191       | 0.006 | 3.9                | 0.422       | 0.028 | 2     |
| 17        | male   | 6           | 0.627        | 19.0        | 1000          | 2.7                   | 0.233       | 0.015 | 2.9                  | 0.371       | 0.011 | 1.1                  | 0.088       | 0.004 | 2.2                | 0.366       | 0.068 | 1     |
| 6         | male   | 13          | 0.554        | 20.0        | 1100          | 1.8                   | 0.160       | 0.020 | 2.0                  | 0.260       | 0.018 | 1.6                  | 0.101       | 0.013 | 1.8                | 0.292       | 0.013 | 1     |

|                                                                                                                                |        |    |       |      |      |            |       |       |            |       |       |            |       |       |            |       |       |   |
|--------------------------------------------------------------------------------------------------------------------------------|--------|----|-------|------|------|------------|-------|-------|------------|-------|-------|------------|-------|-------|------------|-------|-------|---|
| 33                                                                                                                             | male   | 31 | 0.541 | 21.0 | 430  | 4.4        | 0.376 | 0.001 | 2.2        | 0.235 | 0.002 | <b>0.9</b> | 0.082 | 0.003 | 2.1        | 0.222 | 0.007 | 2 |
| 2                                                                                                                              | female | 30 | 0.455 | 22.0 | 1000 | 2.6        | 0.160 | 0.006 | 2.7        | 0.348 | 0.014 | 1.3        | 0.117 | 0.007 | 1.9        | 0.309 | 0.010 | 3 |
| 16                                                                                                                             | female | 37 | 0.408 | 23.0 | 3400 | 2.4        | 0.208 | 0.009 | 2.4        | 0.309 | 0.018 | 1.5        | 0.138 | 0.011 | 1.6        | 0.268 | 0.040 | 1 |
| 21                                                                                                                             | female | 13 | 0.387 | 24.0 | 3300 | 10.0       | 0.848 | 0.013 | 6.0        | 0.776 | 0.117 | 5.5        | 0.483 | 0.009 | 2.8        | 0.473 | 0.018 | 1 |
| 34                                                                                                                             | male   | 24 | 0.358 | 25.0 | 930  | 8.3        | 0.714 | 0.047 | 3.6        | 0.383 | 0.067 | <b>0.7</b> | 0.064 | 0.011 | 3.0        | 0.326 | 0.011 | 2 |
| 29                                                                                                                             | female | 18 | 0.344 | 26.0 | 370  | 3.1        | 0.266 | 0.012 | 2.9        | 0.303 | 0.099 | 1.1        | 0.108 | 0.010 | 1.6        | 0.167 | 0.030 | 2 |
| 4                                                                                                                              | female | 26 | 0.156 | 27.0 | 270  | 2.8        | 0.237 | 0.047 | 1.5        | 0.158 | 0.023 | <b>0.9</b> | 0.083 | 0.010 | 2.0        | 0.218 | 0.005 | 2 |
| 30                                                                                                                             | female | 23 | 0.097 | 28.0 | 860  | 1.5        | 0.134 | 0.008 | 1.5        | 0.154 | 0.014 | <b>0.9</b> | 0.084 | 0.003 | 1.5        | 0.160 | 0.010 | 2 |
| 8                                                                                                                              | female | 37 | 0.074 | 29.0 | 400  | 1.6        | 0.139 | 0.011 | <b>0.8</b> | 0.084 | 0.004 | 1.1        | 0.106 | 0.022 | <b>0.9</b> | 0.100 | 0.008 | 2 |
| 10                                                                                                                             | female | 21 | 0.072 | 30.0 | 240  | 1.3        | 0.114 | 0.018 | 1.2        | 0.127 | 0.006 | 1.0        | 0.099 | 0.001 | <b>0.9</b> | 0.097 | 0.011 | 2 |
| 5                                                                                                                              | female | 6  | 0.052 | 31.0 | 150  | 0.9        | 0.080 | 0.006 | 0.9        | 0.116 | 0.021 | 0.9        | 0.081 | 0.001 | 0.8        | 0.137 | 0.005 | 1 |
| 3                                                                                                                              | male   | 16 | 0.030 | 32.0 | 150  | 0.9        | 0.073 | 0.002 | 0.7        | 0.092 | 0.004 | 0.9        | 0.080 | 0.007 | 0.9        | 0.149 | 0.001 | 1 |
| 7                                                                                                                              | male   | 21 | 0.001 | 33.0 | 150  | <b>1.0</b> | 0.095 | 0.001 | 0.9        | 0.095 | 0.001 | 0.9        | 0.089 | 0.011 | 0.8        | 0.082 | 0.019 | 2 |
| 9                                                                                                                              | male   | 35 | 0.001 | 34.0 | 150  | <b>1.0</b> | 0.098 | 0.000 | 0.9        | 0.088 | 0.002 | 0.9        | 0.089 | 0.002 | 0.9        | 0.091 | 0.001 | 2 |
| 12                                                                                                                             | female | 24 | 0.001 | 35.0 | 150  | 0.8        | 0.078 | 0.004 | <b>1.4</b> | 0.166 | 0.011 | 0.7        | 0.055 | 0.002 | 0.8        | 0.089 | 0.006 | 3 |
| 13                                                                                                                             | female | 40 | 0.001 | 36.0 | 150  | 0.8        | 0.077 | 0.001 | 0.8        | 0.084 | 0.017 | 0.8        | 0.077 | 0.005 | 0.8        | 0.075 | 0.002 | 3 |
| 14                                                                                                                             | male   | 16 | 0.001 | 37.0 | 150  | 0.5        | 0.048 | 0.001 | 0.4        | 0.048 | 0.001 | 0.6        | 0.047 | 0.001 | 0.5        | 0.045 | 0.001 | 3 |
| 15                                                                                                                             | male   | 6  | 0.001 | 38.0 | 150  | 0.6        | 0.053 | 0.004 | 0.5        | 0.052 | 0.004 | 0.7        | 0.054 | 0.004 | 0.6        | 0.053 | 0.004 | 3 |
| 20                                                                                                                             | male   | 53 | 0.001 | 39.0 | 150  | 0.8        | 0.080 | 0.027 | 0.7        | 0.079 | 0.027 | 0.9        | 0.081 | 0.027 | 0.8        | 0.080 | 0.027 | 3 |
| 22                                                                                                                             | female | 16 | 0.001 | 40.0 | 150  | 0.6        | 0.056 | 0.010 | 0.5        | 0.056 | 0.010 | 0.7        | 0.057 | 0.010 | 0.6        | 0.060 | 0.010 | 3 |
| 23                                                                                                                             | female | 14 | 0.001 | 41.0 | 150  | 0.7        | 0.065 | 0.012 | 0.6        | 0.065 | 0.012 | 0.8        | 0.066 | 0.012 | 0.6        | 0.052 | 0.012 | 3 |
| 25                                                                                                                             | female | 26 | 0.001 | 42.0 | 150  | 0.7        | 0.060 | 0.001 | 0.5        | 0.061 | 0.001 | 0.8        | 0.059 | 0.001 | 0.7        | 0.063 | 0.001 | 3 |
|                                                                                                                                |        |    |       |      |      |            |       |       |            |       |       |            |       |       |            |       |       |   |
| <b>cutoff</b>                                                                                                                  |        |    | 0.055 |      | 151# | 1.0        |       |       | 1.0        |       |       | 1.0        |       |       | 1.0        |       |       |   |
| The totality of the samples was measured in 3 independently performed parts (1-3), each resulting in a different cut off value |        |    |       |      |      |            |       |       |            |       |       |            |       |       |            |       |       |   |
| 1                                                                                                                              |        |    |       |      |      |            | 0.085 |       |            | 0.129 |       |            | 0.087 |       |            | 0.157 |       |   |
| 2                                                                                                                              |        |    |       |      |      |            | 0.086 |       |            | 0.105 |       |            | 0.096 |       |            | 0.107 |       |   |
| 3                                                                                                                              |        |    |       |      |      |            | 0.091 |       |            | 0.115 |       |            | 0.082 |       |            | 0.108 |       |   |
| In Bold: above or below cut off value                                                                                          |        |    |       |      |      |            |       |       |            |       |       |            |       |       |            |       |       |   |

# Manufacturer's cut off value

TABLE S2: Raw data of individual human sera for MV immune IgG reaction patterns. Measurements of IgG UI/ml (Enzygnost), serum dilution for 50% PRNT, fold from cut off, OD at 450 nm and standard deviations of each BW:FcγR-ζ reporter cell assay and of the different sera tested for MV-specific IgG detection are listed. Positive values were set if reaching cut off values  $\geq 151$  for ELISA,  $\geq 1$  for each BW:FcγR-ζ assay and  $\geq 0.055$  for the neutralization assay. Positive and negative results are separated by a bold line. Results highlighted in bold were below the value defined as positive for that particular assay in the case of the positive samples or above the value defined as negative for that particular assay in the case of the negative samples. Samples were measured in triplicates. The totality of the samples was measured in three independently performed sub experiments (1, 2, 3), resulting in slightly different cut off values as indicated.
