# Supplementary material for: Highly individual patterns of virus-immune IgG effector responses in humans
Source: Springer Nature journal article supplement (doi:10.1007/s00430-016-0457-y), 2016-05-18
Supplement: MOESM5 [file 10158136]

**Table S3: Raw data for MV immune IgG reaction patterns of vaccinees with low/negative MV-IgG ELISA responses.**

| Donor no. | PRNT (IU/ml) | PRNT IgG (Rank) | ELISA (IU/ml) | FcγRIIIA-ζ activation |             |       | FcγRIIA-ζ activation |             |       | FcγRIIB-ζ activation |             |       | FcγRI-ζ activation |             |       |
|-----------|--------------|-----------------|---------------|-----------------------|-------------|-------|----------------------|-------------|-------|----------------------|-------------|-------|--------------------|-------------|-------|
|           |              |                 |               | Fold of cutoff        | OD (450 nm) | SD    | Fold of cutoff       | OD (450 nm) | SD    | Fold of cutoff       | OD (450 nm) | SD    | Fold of cutoff     | OD (450 nm) | SD    |
| 736       | 1.183        | 1.0             | 220           | 2.0                   | 0.181       | 0.001 | 1.6                  | 0.146       | 0.011 | 1.0                  | 0.089       | 0.008 | 1.3                | 0.124       | 0.013 |
| 723       | 0.918        | 2.0             | 100           | 1.7                   | 0.152       | 0.001 | 1.4                  | 0.131       | 0.007 | 1.0                  | 0.096       | 0.001 | 1.1                | 0.098       | 0.012 |
| 731       | 0.860        | 3.0             | 160           | 3.3                   | 0.304       | 0.011 | 2.6                  | 0.239       | 0.004 | 1.3                  | 0.118       | 0.006 | 1.7                | 0.156       | 0.002 |
| 760       | 0.770        | 4.0             | 320           | 1.8                   | 0.161       | 0.011 | 1.7                  | 0.159       | 0.036 | 1.1                  | 0.098       | 0.004 | 1.1                | 0.103       | 0.011 |
| 728       | 0.648        | 5.0             | 40            | 1.8                   | 0.168       | 0.004 | 1.2                  | 0.110       | 0.009 | 1.1                  | 0.105       | 0.007 | 1.2                | 0.113       | 0.004 |
| 750       | 0.647        | 6.0             | 250           | 1.3                   | 0.124       | 0.003 | 1.2                  | 0.107       | 0.004 | 1.1                  | 0.099       | 0.004 | 1.2                | 0.109       | 0.015 |
| 733       | 0.627        | 7.0             | 150           | 2.7                   | 0.246       | 0.002 | 1.9                  | 0.170       | 0.011 | 1.3                  | 0.122       | 0.006 | 1.3                | 0.124       | 0.023 |
| 748       | 0.521        | 8.0             | 210           | 1.7                   | 0.156       | 0.006 | 1.2                  | 0.114       | 0.001 | 1.2                  | 0.111       | 0.011 | 1.2                | 0.108       | 0.008 |
| 766       | 0.439        | 9.0             | 170           | 1.6                   | 0.151       | 0.016 | 1.3                  | 0.124       | 0.005 | 1.2                  | 0.107       | 0.011 | 1.3                | 0.119       | 0.008 |
| 746       | 0.428        | 10.0            | 100           | 2.0                   | 0.179       | 0.011 | 1.6                  | 0.149       | 0.009 | 1.3                  | 0.122       | 0.006 | 1.4                | 0.127       | 0.006 |
| 735       | 0.394        | 11.0            | 120           | 1.5                   | 0.134       | 0.018 | 1.1                  | 0.101       | 0.005 | 1.1                  | 0.099       | 0.008 | 1.1                | 0.104       | 0.003 |
| 732       | 0.385        | 12.0            | 260           | 2.7                   | 0.243       | 0.004 | 2.5                  | 0.229       | 0.006 | 1.4                  | 0.131       | 0.000 | 1.3                | 0.117       | 0.009 |
| 721       | 0.342        | 13.0            | 180           | 3.1                   | 0.284       | 0.033 | 2.1                  | 0.192       | 0.025 | 1.3                  | 0.118       | 0.001 | 1.2                | 0.111       | 0.007 |
| 724       | 0.340        | 14.0            | 30            | 1.8                   | 0.164       | 0.022 | 1.3                  | 0.120       | 0.008 | 1.1                  | 0.099       | 0.002 | 1.4                | 0.127       | 0.002 |
| 741       | 0.319        | 15.0            | 190           | 1.6                   | 0.143       | 0.011 | 1.3                  | 0.120       | 0.011 | 1.4                  | 0.132       | 0.007 | 1.3                | 0.120       | 0.006 |
| 727       | 0.309        | 16.0            | 0             | 1.6                   | 0.147       | 0.016 | 1.4                  | 0.126       | 0.035 | 1.2                  | 0.115       | 0.023 | 1.2                | 0.114       | 0.012 |
| 751       | 0.241        | 17.0            | 140           | 1.8                   | 0.167       | 0.010 | 1.5                  | 0.134       | 0.008 | 1.3                  | 0.123       | 0.001 | 2.7                | 0.124       | 0.002 |
| 725       | 1.268        | 18.0            | 210           | 2.7                   | 0.244       | 0.029 | 1.7                  | 0.156       | 0.012 | 1.2                  | 0.108       | 0.008 | 1.8                | 0.169       | 0.005 |
| cutoff    | 0.200        |                 |               | 1.0                   | 0.092       |       | 1.0                  | 0.092       |       | 1.0                  | 0.092       |       | 1.0                | 0.092       |       |

TABLE S3: Raw data of vaccinees with low MV-IgG ELISA responses. IgG UI/ml (Enzygnost), fold from cutoff and OD at 450 nm for each BW:FcγR-ζ reporter cell assay and serum dilution for 50% PRNT of the different sera tested for specific MV IgG are listed. Borderline values for Elisa were set if  $\geq 0$  and  $\leq 320$ . Positive values were set if  $\geq 1$  for each BW:FcγR-ζ assay and  $\geq 0.200$  for neutralization. Samples were measured in triplicates.
