# Supplementary material for: Highly individual patterns of virus-immune IgG effector responses in humans
Source: Springer Nature journal article supplement (doi:10.1007/s00430-016-0457-y), 2016-05-18
Supplement: MOESM6 [file 10158136]

**Table S4: Raw data for HCMV immune IgG reaction patterns of individual human sera.**

| Donor no.   | Sex    | Age (years) | PRNT (1/Serum dilution) | PRNT (Rank) | ELISA (IU/ml) | FcγRIIIA-ζ activation |             |       | FcγRIIA-ζ activation |             |       | FcγRIIB-ζ activation |             |       | FcγRI-ζ activation |             |       | Assay |
|-------------|--------|-------------|-------------------------|-------------|---------------|-----------------------|-------------|-------|----------------------|-------------|-------|----------------------|-------------|-------|--------------------|-------------|-------|-------|
|             |        |             |                         |             |               | Fold of cutoff        | OD (450 nm) | SD    | Fold of cutoff       | OD (450 nm) | SD    | Fold of cutoff       | OD (450 nm) | SD    | Fold of cutoff     | OD (450 nm) | SD    |       |
| 44          | FEMALE | 39          | 3584.0                  | 1.0         | 12.0          | 6.8                   | 0.574       | 0.023 | 2.6                  | 0.265       | 0.013 | 1.9                  | 0.159       | 0.030 | 1.4                | 0.133       | 0.001 | 2     |
| 49          | MALE   | 45          | 2850.9                  | 2.0         | 14.6          | 3.5                   | 0.531       | 0.051 | 1.0                  | 0.189       | 0.016 | 1.3                  | 0.175       | 0.004 | 1.0                | 0.210       | 0.008 | 1     |
| 29          | FEMALE | 18          | 1160.0                  | 3.0         | 22.0          | 6.5                   | 0.957       | 0.036 | 1.2                  | 0.238       | 0.019 | 2.2                  | 0.286       | 0.011 | 1.5                | 0.320       | 0.003 | 1     |
| 45          | FEMALE | 66          | 1094.0                  | 4.0         | 22.0          | 6.4                   | 0.544       | 0.071 | 2.6                  | 0.249       | 0.001 | 1.9                  | 0.109       | 0.008 | 1.4                | 0.131       | 0.004 | 2     |
| 46          | MALE   | 45          | 1057.8                  | 5.0         | 22.0          | 3.9                   | 0.336       | 0.060 | 1.8                  | 0.181       | 0.027 | 1.4                  | 0.114       | 0.001 | 1.3                | 0.121       | 0.001 | 2     |
| 50          | FEMALE | 30          | 834.5                   | 6.0         | 6.2           | 2.4                   | 0.352       | 0.034 | 1.6                  | 0.262       | 0.007 | 1.9                  | 0.246       | 0.057 | <b>0.6</b>         | 0.084       | 0.016 | 1     |
| 9           | MALE   | 35          | 789.1                   | 7.0         | 16.5          | 3.8                   | 0.569       | 0.066 | <b>0.9</b>           | 0.178       | 0.006 | 1.2                  | 0.161       | 0.008 | 1.0                | 0.213       | 0.018 | 1     |
| 27          | FEMALE | 40          | 734.0                   | 8.0         | 22.0          | 3.1                   | 0.463       | 0.048 | <b>0.9</b>           | 0.192       | 0.002 | 1.8                  | 0.243       | 0.050 | 1.0                | 0.218       | 0.008 | 1     |
| 19          | MALE   | 27          | 729.3                   | 9.0         | 6.9           | 7.0                   | 0.598       | 0.072 | 2.1                  | 0.207       | 0.016 | 1.7                  | 0.137       | 0.030 | 1.6                | 0.156       | 0.005 | 2     |
| 47          | MALE   | 69          | 599.1                   | 10.0        | 8.2           | 2.2                   | 0.186       | 0.014 | 2.1                  | 0.207       | 0.021 | 1.5                  | 0.122       | 0.012 | 1.3                | 0.126       | 0.017 | 2     |
| <b>IVIG</b> |        |             | 590.3                   | 11.0        | 22.0          | 9.6                   | 0.820       | 0.086 | 2.6                  | 0.263       | 0.013 | 1.8                  | 0.154       | 0.008 | 1.7                | 0.164       | 0.006 | 2     |

|    |        |     |       |      |      |     |       |       |            |       |       |     |       |       |            |       |       |   |
|----|--------|-----|-------|------|------|-----|-------|-------|------------|-------|-------|-----|-------|-------|------------|-------|-------|---|
| 2  | FEMALE | 30  | 501.1 | 12.0 | 9.2  | 2.7 | 0.400 | 0.032 | <b>0.7</b> | 0.127 | 0.010 | 1.8 | 0.238 | 0.049 | 1.4        | 0.306 | 0.006 | 1 |
| 20 | MALE   | 53  | 407.3 | 13.0 | 22.0 | 4.8 | 0.715 | 0.017 | <b>0.7</b> | 0.131 | 0.008 | 1.3 | 0.165 | 0.027 | 1.5        | 0.336 | 0.008 | 1 |
| 12 | FEMALE | 24  | 348.4 | 14.0 | 13.2 | 2.4 | 0.356 | 0.031 | <b>0.8</b> | 0.151 | 0.062 | 1.1 | 0.142 | 0.001 | <b>0.6</b> | 0.140 | 0.050 | 1 |
| 6  | MALE   | 13  | 317.6 | 15.0 | 10.0 | 1.8 | 0.263 | 0.007 | <b>0.8</b> | 0.154 | 0.035 | 1.1 | 0.148 | 0.015 | <b>0.4</b> | 0.081 | 0.029 | 1 |
| 16 | FEMALE | 37  | 253.3 | 16.0 | 7.5  | 2.4 | 0.356 | 0.057 | <b>0.8</b> | 0.160 | 0.052 | 1.5 | 0.193 | 0.037 | <b>0.9</b> | 0.195 | 0.016 | 1 |
| 48 | MALE   | 15  | 252.9 | 17.0 | 5.7  | 1.7 | 0.252 | 0.046 | 1.0        | 0.190 | 0.010 | 1.3 | 0.168 | 0.020 | <b>0.4</b> | 0.092 | 0.004 | 1 |
| 52 | FEMALE | 2   | 196.3 | 18.0 | 9.7  | 8.2 | 0.297 | 0.002 | 1.1        | 0.088 | 0.003 | 2.3 | 0.100 | 0.012 | 3.1        | 0.129 | 0.023 | 3 |
| 42 | MALE   | 55  | 143.3 | 19.0 | 11.4 | 3.1 | 0.262 | 0.029 | 1.9        | 0.189 | 0.012 | 1.5 | 0.128 | 0.036 | 1.1        | 0.103 | 0.001 | 2 |
| 17 | MALE   | 6   | 124.0 | 20.0 | 22.0 | 3.6 | 0.533 | 0.055 | <b>0.9</b> | 0.180 | 0.026 | 1.8 | 0.232 | 0.008 | <b>0.7</b> | 0.160 | 0.042 | 1 |
| 15 | MALE   | 6   | 101.1 | 21.0 | 7.4  | 2.1 | 0.186 | 0.005 | 1.9        | 0.186 | 0.011 | 1.0 | 0.081 | 0.001 | 1.3        | 0.124 | 0.030 | 2 |
| 25 | FEMALE | 26  | 98.8  | 22.0 | 2.1  | 2.6 | 0.223 | 0.013 | 2.0        | 0.200 | 0.008 | 1.9 | 0.157 | 0.005 | 1.5        | 0.147 | 0.011 | 2 |
| 26 | FEMALE | 27  | 70.0  | 23.0 | 5.8  | 2.8 | 0.236 | 0.001 | 1.5        | 0.147 | 0.004 | 1.6 | 0.133 | 0.021 | 1.2        | 0.121 | 0.011 | 2 |
| 43 | FEMALE | 51  | 30.0  | 24.0 | 2.2  | 2.3 | 0.198 | 0.006 | 1.5        | 0.154 | 0.011 | 1.1 | 0.092 | 0.006 | 1.0        | 0.092 | 0.006 | 2 |
| 51 | FEMALE | 0.2 | 30.0  | 25.0 | 1.0  | 2.3 | 0.084 | 0.000 | <b>0.8</b> | 0.059 | 0.004 | 1.8 | 0.078 | 0.008 | 1.6        | 0.068 | 0.001 | 3 |
| 22 | FEMALE | 16  | 7.8   | 26.0 | 4.1  | 1.8 | 0.156 | 0.006 | 1.2        | 0.121 | 0.016 | 1.7 | 0.142 | 0.040 | 1.3        | 0.127 | 0.018 | 2 |
| 1  | FEMALE | 28  | 5.0   | 27.0 | 4.2  | 2.4 | 0.204 | 0.004 | 1.6        | 0.165 | 0.013 | 2.3 | 0.191 | 0.000 | 1.3        | 0.124 | 0.013 | 2 |
| 53 | FEMALE | 67  | 5.0   | 28.0 | 4.2  | 2.4 | 0.088 | 0.001 | 1.7        | 0.135 | 0.008 | 3.1 | 0.134 | 0.018 | 1.8        | 0.076 | 0.012 | 3 |
| 3  | MALE   | 16  | 5.0   | 29.0 | 0.2  | 0.6 | 0.102 | 0.006 | 0.6        | 0.120 | 0.008 | 0.8 | 0.114 | 0.006 | 0.8        | 0.149 | 0.005 | 1 |

|               |        |     |     |      |      |            |       |       |     |       |       |            |       |       |     |       |       |   |
|---------------|--------|-----|-----|------|------|------------|-------|-------|-----|-------|-------|------------|-------|-------|-----|-------|-------|---|
| <b>4</b>      | FEMALE | 26  | 5.0 | 30.0 | 0.2  | 0.9        | 0.139 | 0.030 | 0.6 | 0.118 | 0.011 | 0.9        | 0.130 | 0.015 | 0.6 | 0.135 | 0.038 | 1 |
| <b>5</b>      | FEMALE | 6   | 5.0 | 31.0 | 0.2  | 0.8        | 0.072 | 0.002 | 0.9 | 0.074 | 0.006 | 0.9        | 0.070 | 0.001 | 0.8 | 0.076 | 0.004 | 2 |
| <b>7</b>      | MALE   | 21  | 5.0 | 32.0 | 0.2  | 0.9        | 0.084 | 0.008 | 0.9 | 0.088 | 0.001 | 0.8        | 0.069 | 0.016 | 0.7 | 0.072 | 0.000 | 2 |
| <b>8</b>      | FEMALE | 37  | 5.0 | 33.0 | 0.2  | <b>1.0</b> | 0.040 | 0.001 | 0.7 | 0.044 | 0.013 | <b>1.0</b> | 0.052 | 0.003 | 0.9 | 0.035 | 0.008 | 3 |
| <b>10</b>     | FEMALE | 21  | 5.0 | 34.0 | 0.2  | <b>1.0</b> | 0.037 | 0.001 | 0.7 | 0.041 | 0.014 | <b>1.1</b> | 0.055 | 0.031 | 0.9 | 0.035 | 0.004 | 3 |
| <b>11</b>     | MALE   | 31  | 5.0 | 35.0 | 0.2  | 0.5        | 0.040 | 0.002 | 0.6 | 0.039 | 0.002 | 0.5        | 0.045 | 0.008 | 0.6 | 0.024 | 0.001 | 2 |
| <b>13</b>     | FEMALE | 40  | 5.0 | 36.0 | 0.2  | 0.6        | 0.036 | 0.000 | 0.5 | 0.033 | 0.005 | 0.8        | 0.035 | 0.002 | 0.9 | 0.038 | 0.002 | 2 |
| <b>14</b>     | MALE   | 16  | 5.0 | 37.0 | 0.2  | 0.6        | 0.022 | 0.004 | 0.3 | 0.041 | 0.011 | 0.9        | 0.041 | 0.011 | 0.9 | 0.038 | 0.007 | 3 |
| <b>18</b>     | MALE   | 63  | 5.0 | 38.0 | 0.2  | 0.8        | 0.029 | 0.001 | 0.2 | 0.037 | 0.002 | 0.6        | 0.046 | 0.008 | 0.5 | 0.048 | 0.004 | 3 |
| <b>21</b>     | FEMALE | 13  | 5.0 | 39.0 | 0.2  | 0.8        | 0.052 | 0.002 | 0.6 | 0.055 | 0.006 | 0.5        | 0.043 | 0.011 | 0.6 | 0.048 | 0.008 | 2 |
| <b>23</b>     | FEMALE | 14  | 5.0 | 40.0 | 0.2  | 0.5        | 0.016 | 0.003 | 0.8 | 0.046 | 0.003 | 0.5        | 0.026 | 0.003 | 0.4 | 0.019 | 0.003 | 3 |
| <b>24</b>     | FEMALE | 1.7 | 5.0 | 41.0 | 0.2  | 0.6        | 0.025 | 0.001 | 0.4 | 0.034 | 0.007 | 0.9        | 0.032 | 0.010 | 0.9 | 0.039 | 0.001 | 3 |
| <b>28</b>     | FEMALE | 18  | 5.0 | 42.0 | 0.2  | 0.5        | 0.019 | 0.005 | 0.3 | 0.028 | 0.011 | 0.6        | 0.024 | 0.006 | 0.4 | 0.020 | 0.005 | 3 |
|               |        |     |     |      |      |            |       |       |     |       |       |            |       |       |     |       |       |   |
| <b>CUTOFF</b> |        |     | 6.0 |      | 0.3# | 1.0        |       |       | 1.0 |       |       | 1.0        |       |       | 1.0 |       |       |   |

The totality of the samples was measured in 3 independently performed parts (1-3), each resulting in a different cut off value

|          |  |  |  |  |  |  |       |  |  |       |  |  |       |  |  |       |  |  |
|----------|--|--|--|--|--|--|-------|--|--|-------|--|--|-------|--|--|-------|--|--|
| <b>1</b> |  |  |  |  |  |  | 0.148 |  |  | 0.193 |  |  | 0.132 |  |  | 0.220 |  |  |
| <b>2</b> |  |  |  |  |  |  | 0.085 |  |  | 0.100 |  |  | 0.084 |  |  | 0.095 |  |  |

|                                       |  |  |  |  |  |  |       |  |  |       |  |  |       |  |  |       |  |  |
|---------------------------------------|--|--|--|--|--|--|-------|--|--|-------|--|--|-------|--|--|-------|--|--|
| <b>3</b>                              |  |  |  |  |  |  | 0.036 |  |  | 0.077 |  |  | 0.043 |  |  | 0.041 |  |  |
| In Bold: above or below cut off value |  |  |  |  |  |  |       |  |  |       |  |  |       |  |  |       |  |  |
| # Manufacturer's cut off value        |  |  |  |  |  |  |       |  |  |       |  |  |       |  |  |       |  |  |

TABLE S4: Raw data of individual human sera. IgG U/ml (LIAISON), serum dilution for 50% PRNT, fold from cut off, OD at 450 nm and standard deviations for each BW:FcγR-ζ reporter cell assay and of the different sera tested for specific HCMV IgG are listed. Positive values were set if  $\geq 0.3$  for ELISA,  $\geq 1$  for each BW:FcγR-ζ assay and  $\geq 6$  for neutralization. Positive and negative results are separated by a bold line. Results highlighted in bold were below the value defined as positive for that particular assay in the case of the positive samples or above the value defined as negative for that particular assay in the case of the negative samples. Samples were measured in triplicates. The totality of the samples was measured in three independently performed sub experiments (1, 2, 3), resulting in different cut off values as indicated.
